# Supplementary figures and images for: Attenuating CD3 affinity in a PSMAxCD3 bispecific antibody enables killing of prostate tumor cells with reduced cytokine release
Source: HighWire-hosted journal article supplement (doi:10.1136/jitc-2021-002488), 2021-06-01

**Figure S2**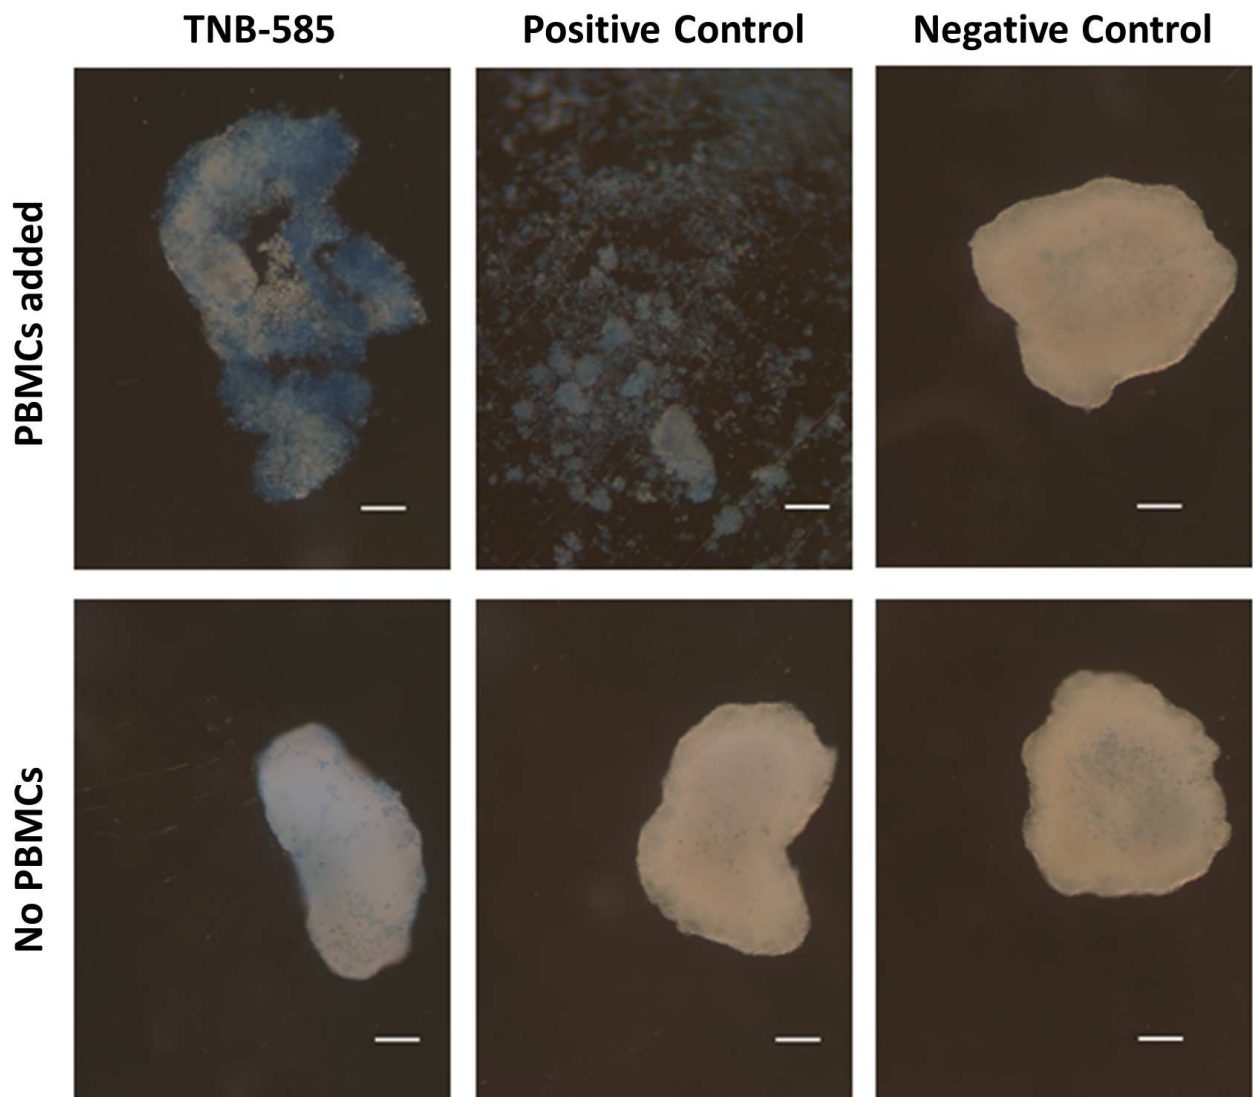200  $\mu$ m scalebar

Supplement: jitc-2021-002488supp003_data_supplement.pdf [file jitc-2021-002488supp003_data_supplement.pdf]
